# Supplementary material for: Microporous Activated Carbon from Pisum sativum Pods Using Various Activation Methods and Tested for Adsorption of Acid Orange 7 Dye from Water
Source: MDPI journal article supplement (doi:10.3390/molecules27154840), 2022-07-28
Supplement: s1 [file s1]

# Microporous Activated Carbon from *Pisum sativum* Pods Using Various Activation Methods and Tested for Adsorption of Acid Orange 7 Dye from Water

Mohamed A. El-Nemr <sup>1</sup>, Ahmed El Nemr <sup>2,\*</sup>, Mohamed A. Hassaan <sup>2</sup>, Safaa Ragab <sup>2</sup>, Luigi Tedone <sup>3</sup>, Giuseppe De Mastro <sup>3</sup> and Antonio Pantaleo <sup>3</sup>

<sup>1</sup> Department of Chemical Engineering, Faculty of Engineering, Minia University, Minia, Egypt; mohamedelnemr1992@yahoo.com

<sup>2</sup> National Institute of Oceanography and Fisheries (NIOF), Marine Pollution Lab, Alexandria 21556, Egypt; mhss95@mail.com (M.A.H.); safaa\_ragab65@yahoo.com (S.R.)

<sup>3</sup> Department of Agriculture and Environmental Sciences, Bari University, 70121 Bari, Italy; luigi.tedone@uniba.it (L.T.); giuseppe.demastro@uniba.it (G.D.M.); antonio.pantaleo@uniba.it (A.P.)

\* Correspondence: ahmedmoustafaelnemr@yahoo.com or ahmed.m.elnemr@gmail.com

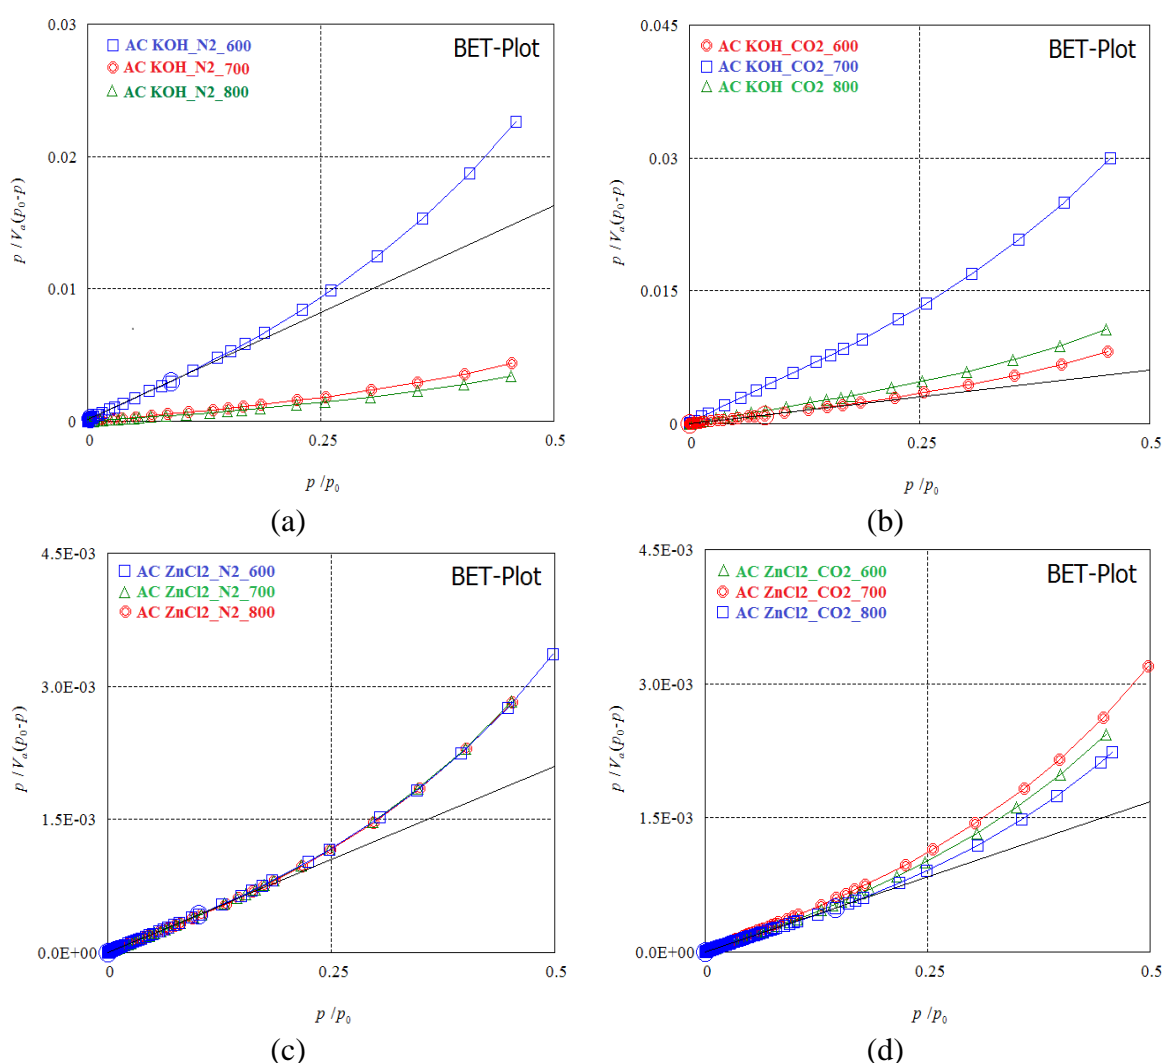

**Figure S1.** BET analysis of AC prepared from pea pods impregnated with using (a) KOH and carbonized under N<sub>2</sub> gas flow, (b) KOH and carbonized under CO<sub>2</sub> gas flow, (c) ZnCl<sub>2</sub> and carbonized under N<sub>2</sub> gas flow, and (d) ZnCl<sub>2</sub> and carbonized under CO<sub>2</sub> gas flow.

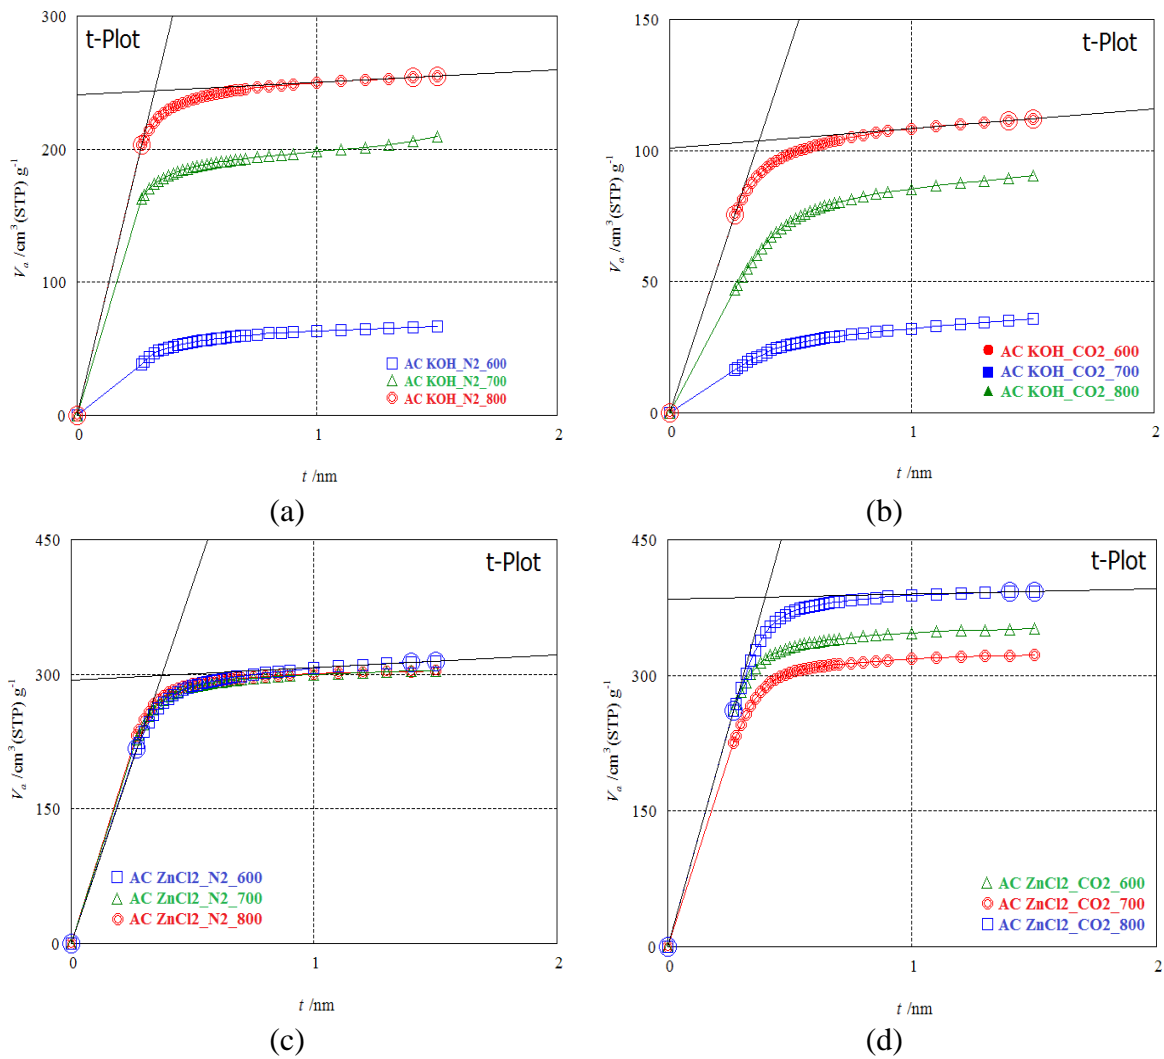

**Figure S2.** The t-plot analysis of AC prepared from pea pods impregnated with using (a) KOH and carbonized under N<sub>2</sub> gas flow, (b) KOH and carbonized under CO<sub>2</sub> gas flow, (c) ZnCl<sub>2</sub> and carbonized under N<sub>2</sub> gas flow, and (d) ZnCl<sub>2</sub> and carbonized under CO<sub>2</sub> gas flow.

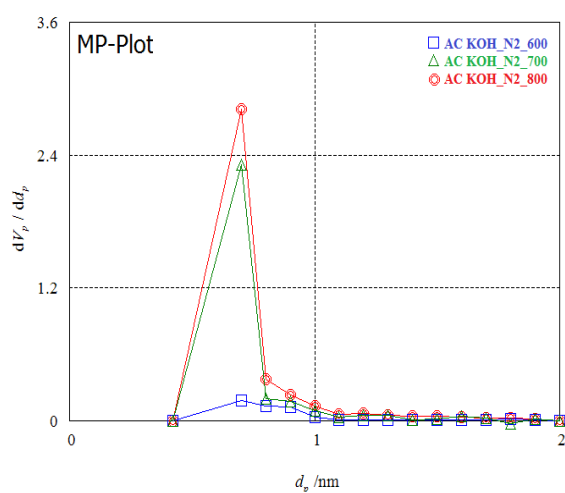

(a)

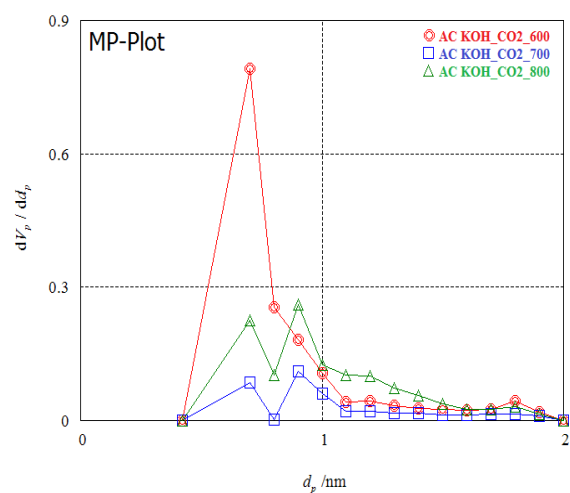

(b)

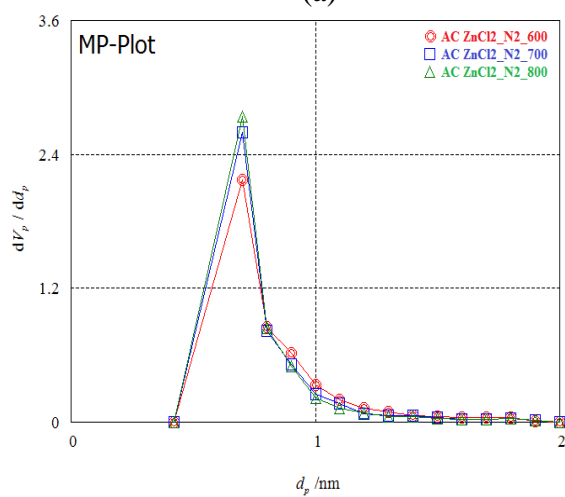

(c)

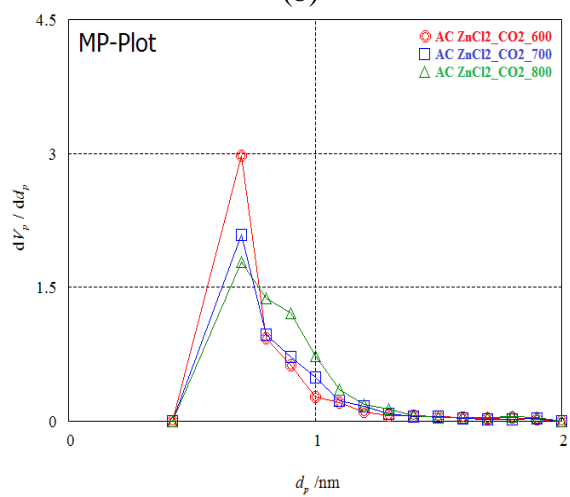

(d)

**Figure S3.** (a) MP analysis of AC KOH-N<sub>2</sub> (b) MP analysis of AC KOH-CO<sub>2</sub>, (c) MP analysis of AC ZnCl<sub>2</sub>-N<sub>2</sub> (d) MP analysis of AC ZnCl<sub>2</sub>-CO<sub>2</sub>.
